# Supplementary material
Source: HighWire-hosted journal article supplement (https://jnis.bmj.com/content/14/9/892)
Supplement: inline-supplementary-material-2 [file inline-supplementary-material-2.pdf]

Supplementary Table 1. Baseline and procedural characteristics of the three groups

| Characteristic                       | SCBT<br>(n = 240) | SR<br>(n = 128) | CA<br>(n = 173) | p-value |
|--------------------------------------|-------------------|-----------------|-----------------|---------|
| Age, years, median (IQR)             | 81 (70.2–86)      | 78 (67–83.7)    | 79 (72–85)      | 0.049   |
| Male                                 | 114 (47.5)        | 60 (46.8)       | 81 (46.8)       | 0.988   |
| Hypertension                         | 161 (67.0)        | 81 (63.2)       | 113 (65.3)      | 0.761   |
| Diabetes                             | 47 (19.5)         | 23 (17.9)       | 38 (21.9)       | 0.679   |
| Dyslipidaemia                        | 89 (37.0)         | 40 (31.2)       | 50 (28.9)       | 0.192   |
| Chronic kidney disease               | 41 (17.0)         | 29 (22.6)       | 39 (22.5)       | 0.283   |
| Atrial fibrillation                  | 167 (69.5)        | 67 (52.3)       | 115 (66.4)      | 0.003   |
| Mothership patient                   | 58 (24.1)         | 20 (15.6)       | 41 (23.7)       | 0.136   |
| NIHSS, median (IQR)                  | 20 (14–24)        | 18 (13–23)      | 19 (14–24)      | 0.377   |
| Pre-stroke mRS $\geq 1$              | 107 (44.5)        | 34 (26.5)       | 66 (38.1)       | 0.003   |
| ASPECTS, median (IQR)                | 9 (7–10)          | 9 (8–10)        | 10 (8–10)       | 0.195   |
| Side of occlusion (Left)             | 139 (57.9)        | 70 (54.6)       | 101 (58.3)      | 0.787   |
| Site of occlusion                    |                   |                 |                 |         |
| MCA-M1                               | 96 (40.0)         | 68 (53.1)       | 77 (44.5)       | 0.038   |
| MCA-M2                               | 51 (21.2)         | 17 (13.2)       | 43 (24.8)       |         |
| ICA                                  | 93 (38.7)         | 43 (33.5)       | 53 (30.6)       |         |
| Suspected stroke aetiology           |                   |                 |                 |         |
| Atherosclerosis                      | 13 (5.4)          | 11 (8.5)        | 8 (4.6)         | 0.301   |
| Cardioembolic                        | 200 (83.3)        | 97 (75.7)       | 147 (84.9)      |         |
| Other or unknown                     | 27 (11.2)         | 20 (15.6)       | 18 (10.4)       |         |
| Intra-venous rtPA                    | 110 (45.8)        | 64 (50.0)       | 84 (48.5)       | 0.719   |
| Time intervals                       |                   |                 |                 |         |
| Onset to puncture, min, median (IQR) | 185 (123.5–370)   | 170 (131–265.5) | 205 (139–307)   | 0.375   |
| Attending doctor (Specialist)        | 213 (88.7)        | 94 (73.4)       | 152 (87.8)      | <0.001  |

Values are in number of patients (%). SCBT, single-unit combined technique; SR, stent retriever; CA, contact aspiration; IQR, interquartile range; NIHSS, National Institute of Health Stroke Scale; mRS, modified Rankin Scale; ASPECTS, Alberta Stroke Program Early CT Score; MCA, middle cerebral artery; ICA, internal carotid artery; rtPA, recombinant tissue plasminogen activator
