# Supplementary material
Source: HighWire-hosted journal article supplement (https://jnis.bmj.com/content/14/9/892)
Supplement: inline-supplementary-material-4 [file inline-supplementary-material-4.pdf]

Supplementary Table 3. Procedural background and outcomes of the two groups in terms of the era of treatment (pre-2017 or post-2018)

|                                                                         | Pre-2017<br>(n = 282) | Post-2018<br>(n = 259) | <i>p</i> -value |
|-------------------------------------------------------------------------|-----------------------|------------------------|-----------------|
| Thrombectomy technique (CBT)                                            | 48 (17.0)             | 192 (74.1)             | <0.001          |
| Intra-venous rtPA                                                       | 138 (48.9)            | 120 (46.3)             | 0.544           |
| Onset to door, min, median<br>(IQR)                                     | 107.5 (42.2-221)      | 99 (46.5-241.5)        | 0.698           |
| Onset to puncture, min, median<br>(IQR)                                 | 202 (134-329)         | 175.5 (123-318.7)      | 0.097           |
| Aspiration catheter                                                     |                       |                        |                 |
| ID, -0.053 inches<br>(3MAX, 4MAX)                                       | 18 (9.2)              | 42 (18.1)              | <0.001          |
| ID, 0.054-0.067 inches<br>(5MAX, 5MAX ACE 60,<br>5Fr SOFIA, Catalyst 6) | 172 (88.2)            | 142 (61.2)             |                 |
| ID, 0.068 inches<br>(ACE 68, 6Fr SOFIA)                                 | 5 (2.5)               | 48 (20.6)              |                 |
| Reperfusion after first pass<br>procedure                               |                       |                        |                 |
| mTICI 2c – 3                                                            | 88 (31.2)             | 100 (38.6)             | 0.070           |
| mTICI 3                                                                 | 77 (27.3)             | 86 (33.2)              | 0.135           |
| Reperfusion at end of all<br>procedures                                 |                       |                        |                 |
| mTICI 2b–3                                                              | 239 (84.7)            | 222 (85.7)             | 0.752           |
| mTICI 2c–3                                                              | 152 (53.9)            | 154 (59.4)             | 0.192           |
| mTICI3                                                                  | 139 (49.2)            | 116 (44.7)             | 0.294           |
| Complications                                                           |                       |                        |                 |
| Symptomatic haemorrhagic<br>complication                                | 14<br>(4.9)           | 11<br>(4.2)            | 0.691           |
| Vessel perforation, no./total no.<br>(%)                                | 1/190 (0.5)           | 5/156 (3.2)            | 0.057           |

|                                               |               |               |       |
|-----------------------------------------------|---------------|---------------|-------|
| Emboli to new territory, no./total<br>no. (%) | 1/190 (0.5)   | 2/156 (1.2)   | 0.450 |
| Distal clot migration, no./total<br>no. (%)   | 26/190 (13.6) | 24/156 (15.3) | 0.654 |
| Attending doctor (Specialist)                 | 236 (83.6)    | 223 (86.1)    | 0.434 |

---

Values are in number of patients (%) unless otherwise indicated.

SCBT, single-unit combined technique; rtPA, recombinant tissue plasminogen activator; ID, inner diameter; mTICI, modified Thrombolysis in Cerebral Infarction
