# Supplementary material
Source: HighWire-hosted journal article supplement (https://jnis.bmj.com/content/14/9/892)

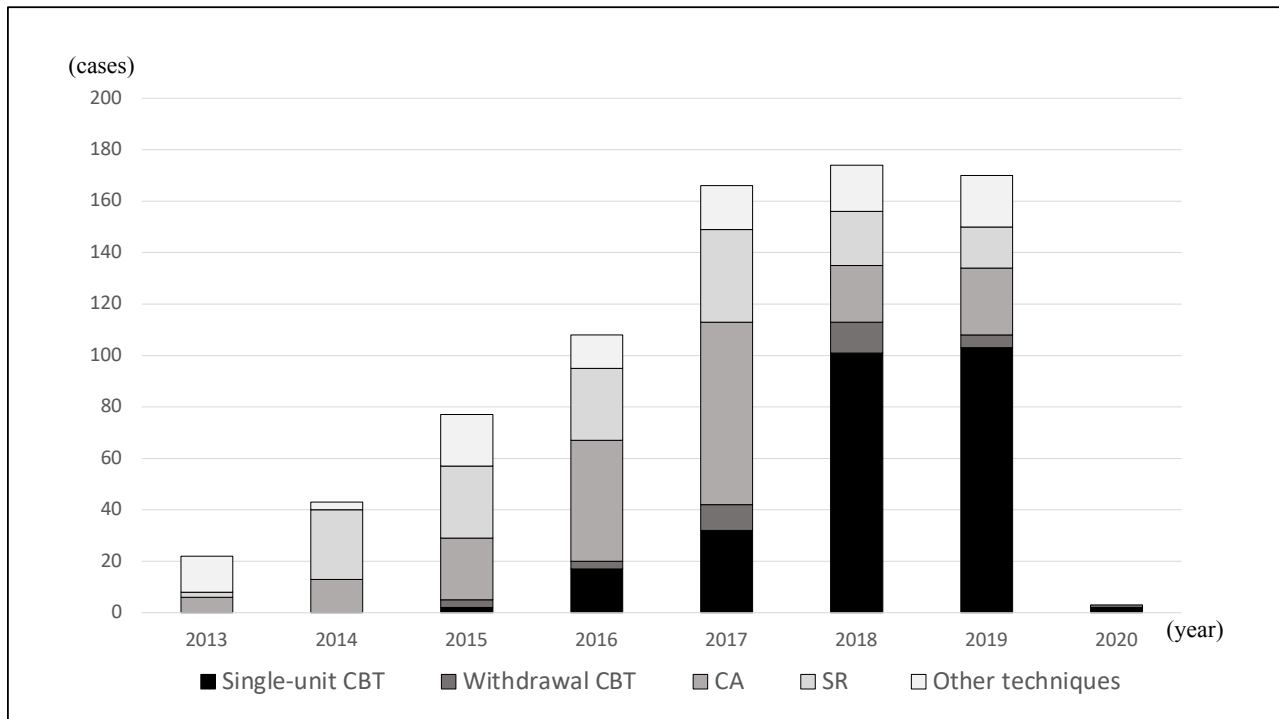

Supplementary Figure 1. Case numbers for each technique per year

Supplement: inline-supplementary-material-1 [file inline-supplementary-material-1.pdf]
